# Supplementary material for: Synthesis, structures, luminescence and magnetism of nine lanthanide complexes with three-dimensional frameworks constructed from 2-(pyridyl-N-oxide)methylphosphonic acid and oxalic acid
Source: Royal Society of Chemistry journal article supplement (doi:10.1039/c6ce00023a), 2016-01-01
Supplement: c6ce00023a1.pdf [file c6ce00023a1.pdf]

## Supporting Information

Synthesis, structures, luminescence and magnetism of nine lanthanide complexes with three-dimensional frameworks constructed from 2-(pyridyl-N-oxide)methylphosphonic acid and oxalic acid

*Guang-Tu Wang<sup>a</sup>, Jing-Chuan Zhang<sup>a</sup>, Zeng-Yi Tang<sup>a</sup>, Heng-Tai Zhou<sup>a</sup>, Li Zhang<sup>a</sup>, Rui-Wu Yang<sup>c</sup>, Ping Zou<sup>a\*</sup>, Ying-Hui Yu<sup>b</sup>, Jin-Sheng Gao<sup>b</sup>, Guang-Feng Hou<sup>b\*</sup>*

<sup>a</sup>College of Science, Sichuan Agriculture University, Ya'an 625014, People's Republic of China.

<sup>b</sup>Engineering Research Center of Pesticide, Heilongjiang University, Harbin 150080, People's Republic of China.

<sup>c</sup>College of Life Science, Sichuan Agriculture University Ya'an 625014, People's Republic of China.

\*Corresponding author:

zouping1971@163.com (P. Zou), Tel: +86-835-2886189.

hougf@hlju.edu.cn (G. F. Hou), Tel: +86-451-86609001.

Table S1. Selected bond distances (Å) for **1–5**.

|                           | <b>1-Eu</b> | <b>2-Gd</b> | <b>3-Tb</b> | <b>4-Dy</b> | <b>5-Ho</b> |
|---------------------------|-------------|-------------|-------------|-------------|-------------|
| Ln(1)-O(3) <sup>I</sup>   | 2.298(3)    | 2.295(3)    | 2.273(3)    | 2.265(3)    | 2.255(3)    |
| Ln(1)-O(1)                | 2.313(3)    | 2.310(3)    | 2.289(3)    | 2.276(3)    | 2.264(3)    |
| Ln(1)-O(4) <sup>I</sup>   | 2.397(3)    | 2.389(3)    | 2.379(3)    | 2.370(3)    | 2.363(3)    |
| Ln(1)-O(9)                | 2.402(4)    | 2.399(3)    | 2.372(3)    | 2.363(4)    | 2.349(3)    |
| Ln(1)-O(5) <sup>II</sup>  | 2.425(3)    | 2.414(3)    | 2.394(3)    | 2.380(3)    | 2.373(3)    |
| Ln(1)-O(6)                | 2.447(3)    | 2.443(3)    | 2.426(3)    | 2.418(3)    | 2.412(3)    |
| Ln(1)-O(7)                | 2.453(3)    | 2.448(3)    | 2.430(3)    | 2.421(3)    | 2.410(3)    |
| Ln(1)-O(8) <sup>III</sup> | 2.474(3)    | 2.468(3)    | 2.452(3)    | 2.443(3)    | 2.436(3)    |

Symmetric codes: I:  $-x, -0.5+y, 0.5-z$ ; II:  $-x, 2-y, 1-z$ ; III:  $1-x, 2-y, 1-z$ .

|                            | <b>6-Er</b> | <b>7-TM</b> | <b>8-Yb</b> | <b>9-Lu</b> |
|----------------------------|-------------|-------------|-------------|-------------|
| Ln(1)-O(1)                 | 2.202(4)    | 2.189(7)    | 2.171(3)    | 2.159(5)    |
| Ln(1)-O(3) <sup>I</sup>    | 2.218(3)    | 2.203(7)    | 2.195(4)    | 2.185(5)    |
| Ln(1)-O(14)                | 2.301(4)    | 2.284(8)    | 2.267(5)    | 2.266(6)    |
| Ln(1)-O(4) <sup>I</sup>    | 2.311(4)    | 2.292(7)    | 2.274(4)    | 2.269(5)    |
| Ln(1)-O(13)                | 2.325(4)    | 2.308(7)    | 2.293(4)    | 2.285(5)    |
| Ln(1)-O(7)                 | 2.368(4)    | 2.347(7)    | 2.352(4)    | 2.341(5)    |
| Ln(1)-O(5)                 | 2.384(4)    | 2.377(7)    | 2.352(5)    | 2.353(5)    |
| Ln(2)-O(2)                 | 2.213(4)    | 2.200(6)    | 2.187(4)    | 2.178(5)    |
| Ln(2)-O(9)                 | 2.325(4)    | 2.302(7)    | 2.302(4)    | 2.288(6)    |
| Ln(2)-O(15)                | 2.327(4)    | 2.296(7)    | 2.288(4)    | 2.285(5)    |
| Ln(2)-O(12) <sup>III</sup> | 2.354(3)    | 2.335(6)    | 2.327(4)    | 2.313(5)    |
| Ln(2)-O(11)                | 2.379(4)    | 2.362(7)    | 2.345(4)    | 2.341(5)    |
| Ln(2)-O(10) <sup>III</sup> | 2.400(4)    | 2.382(7)    | 2.379(4)    | 2.370(5)    |
| Ln(2)-O(8) <sup>II</sup>   | 2.410(4)    | 2.399(7)    | 2.378(4)    | 2.372(5)    |
| Ln(2)-O(6) <sup>II</sup>   | 2.422(4)    | 2.407(7)    | 2.399(4)    | 2.399(5)    |

Symmetric codes: I:  $-x, -0.5+y, 0.5-z$ ; II:  $-x, 2-y, 1-z$ ; III:  $1-x, 2-y, 1-z$ .

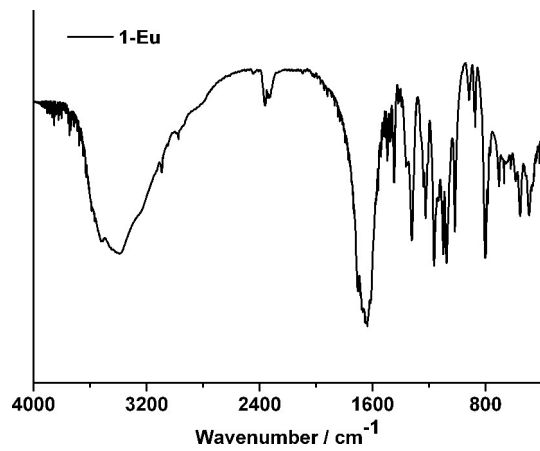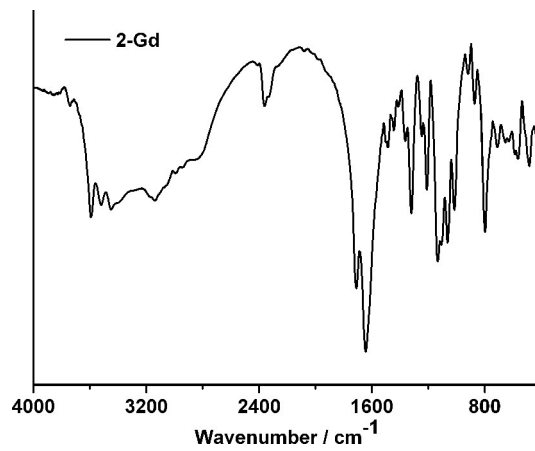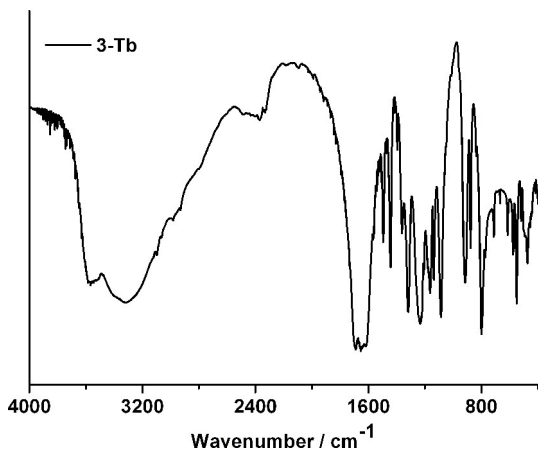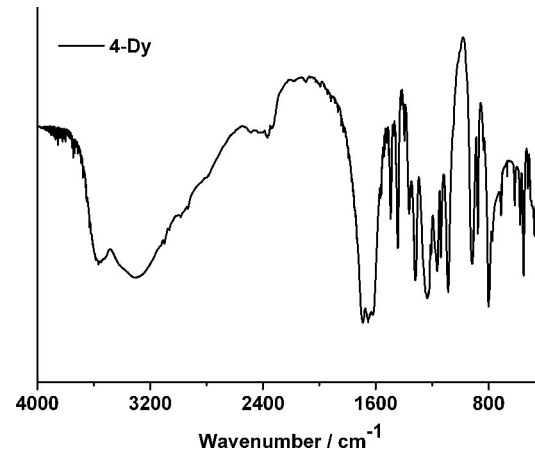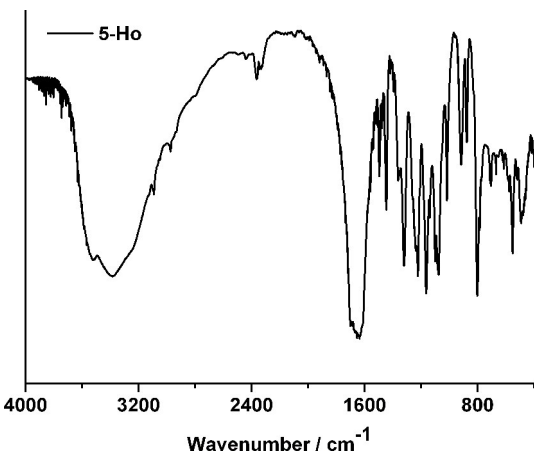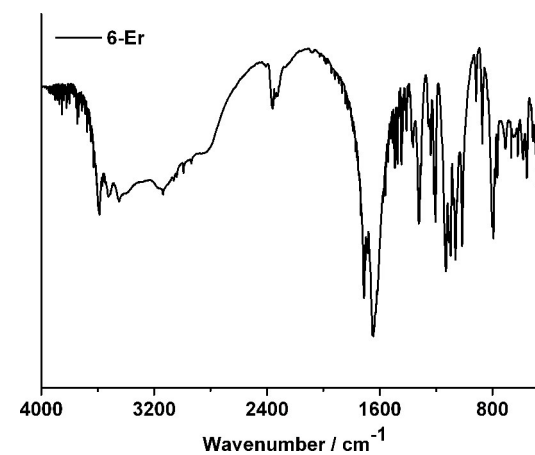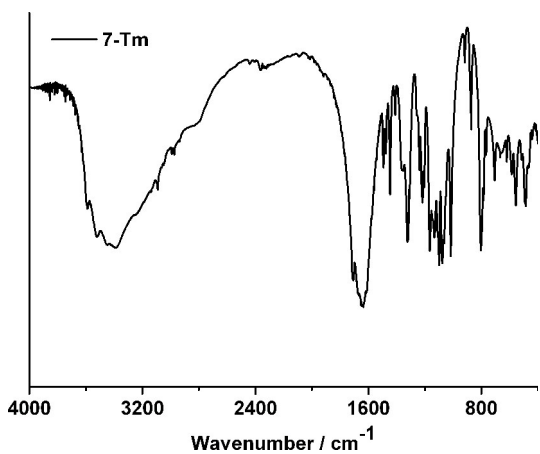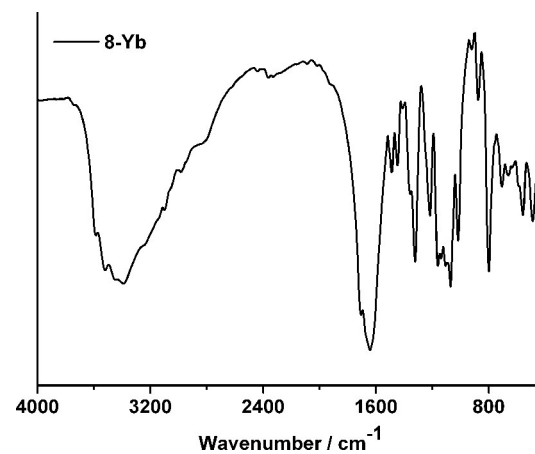

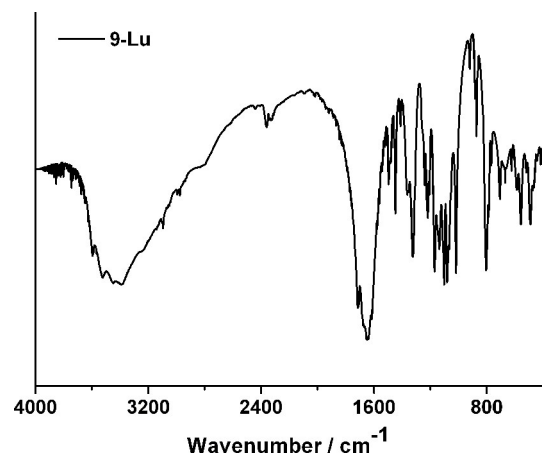

**Fig. S1** IR of complexes 1–9.

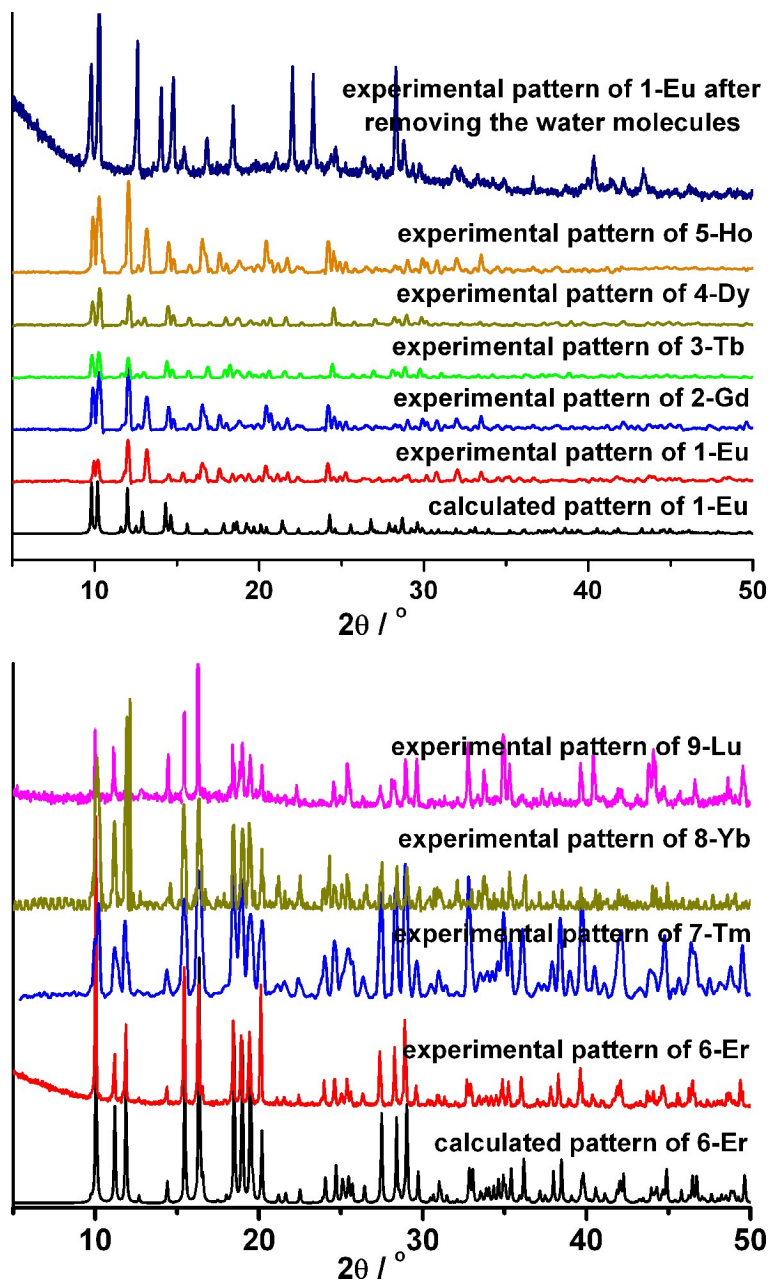

**Fig. S2** Calculated and experimental XPD patterns of complexes 1–5 and 6–9 (Only the calculated patterns of 1 and 6 are only shown due to isomorphism).

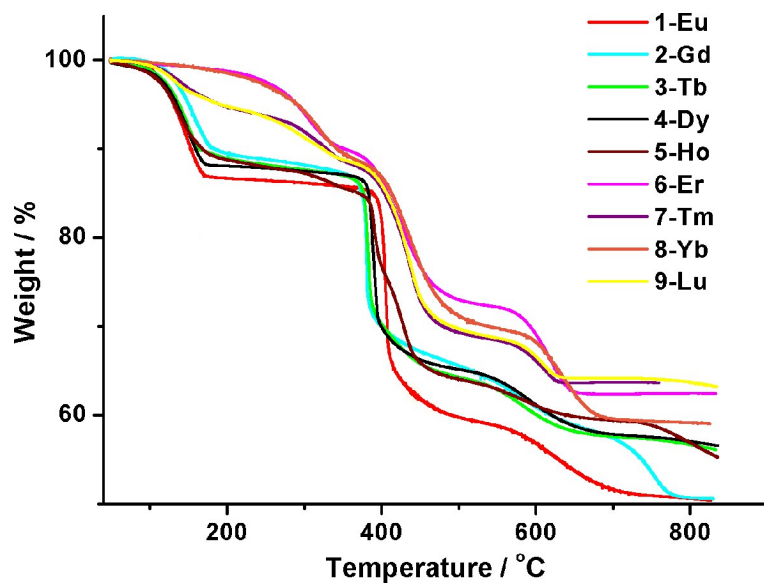

**Fig. S3** TGA curves of complexes 1–9.

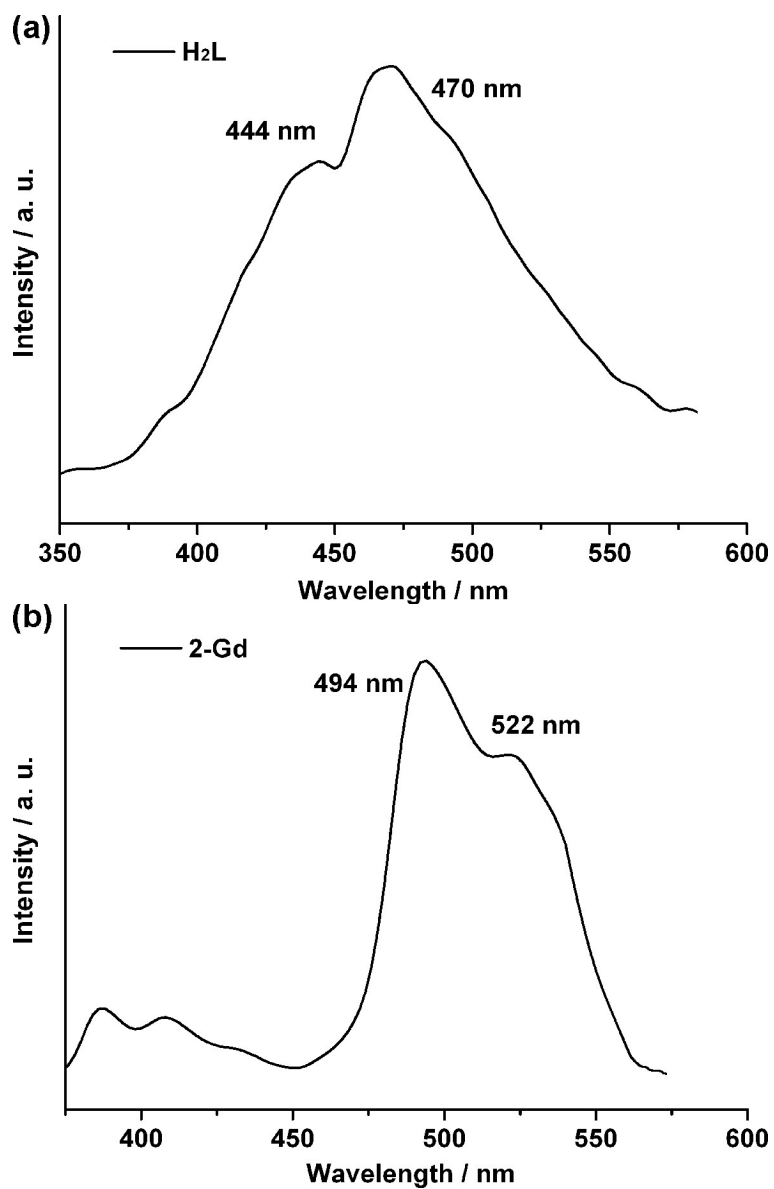

**Fig. S4** Solid-state emission spectra of H<sub>2</sub>L and complex 2.

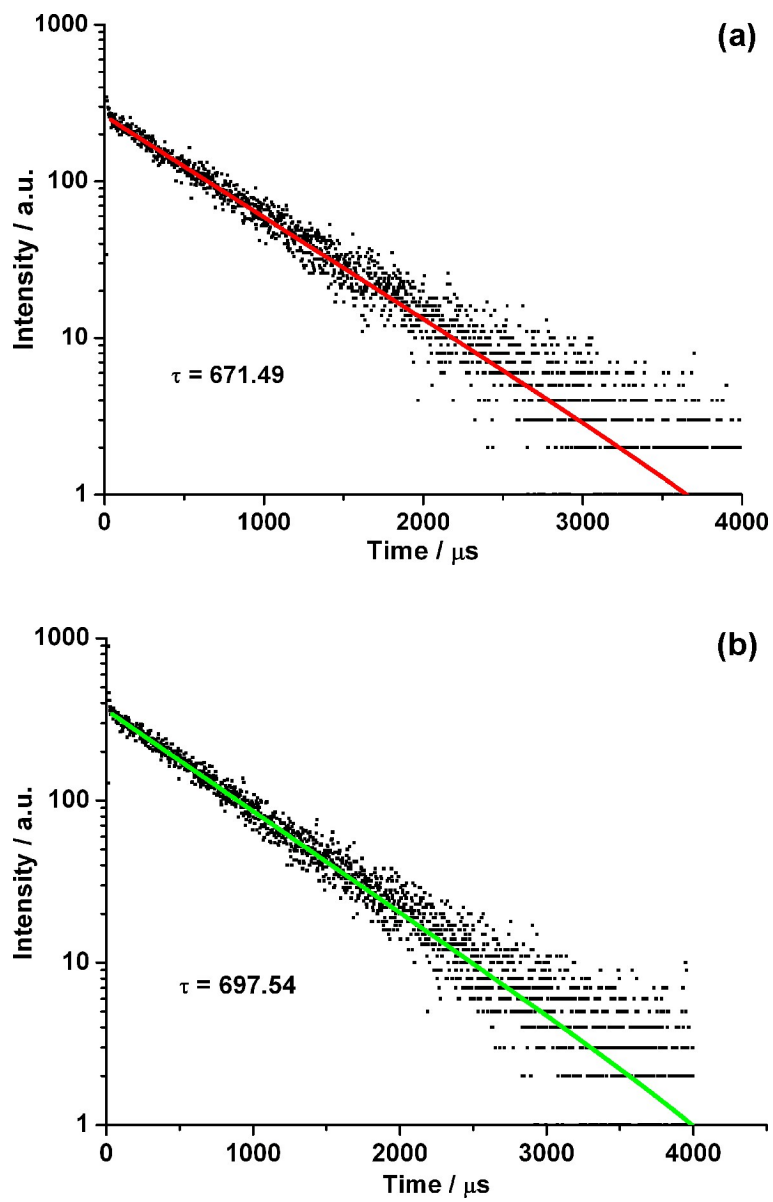

Fig. S5 Luminescent decay curves for complex 1 (a) and 3 (b).
